# Supplementary material for: Xpert MTB/RIF Ultra is highly sensitive for the diagnosis of tuberculosis lymphadenitis in an HIV-endemic setting
Source: bioRxiv or medRxiv preprint supplement (doi:10.1101/2021.06.11.21258751), 2021-06-16
Supplement: Supplementary file [file media-1.pdf]

|    |                                                                                                |                                     |
|----|------------------------------------------------------------------------------------------------|-------------------------------------|
| 1  | <b>Table of Contents</b>                                                                       |                                     |
| 2  | <b>Supplementary Table 1:</b> Reference standard definitions .....                             | 2                                   |
| 3  | <b>Definitions</b> .....                                                                       | 3                                   |
| 4  | Microbiological reference standard .....                                                       | 3                                   |
| 5  | Extended microbiological reference standard .....                                              | 3                                   |
| 6  | Composite reference standard .....                                                             | 3                                   |
| 7  | <b>Supplementary Results</b> .....                                                             | 5                                   |
| 8  | Bacterial load in study Ultra and routine Xpert.....                                           | 5                                   |
| 9  | Drug susceptibility results of study Ultras on FNABs .....                                     | 5                                   |
| 10 | <b>Supplementary Figure 1:</b> Spaghetti and box and whiskers plots showing FNAB Ultra         |                                     |
| 11 | internal positive control quantitative information (SPC CT). (A) Study SPC CTs vs.             |                                     |
| 12 | routine SPC CTs.....                                                                           | 6                                   |
| 13 | <b>Supplementary Figure 2:</b> Quantitative information of Ultra (IS6110/IS1081, rpoB) and     |                                     |
| 14 | Xpert (rpoB) compared with bacillary load (MGIT960 liquid culture TTP).....                    | 7                                   |
| 15 | <b>Supplementary Table 2:</b> Non-head-to-head and head-to-head diagnostic accuracy            |                                     |
| 16 | analyses of Xpert and Ultra using a microbiological reference standard (MRS), extended         |                                     |
| 17 | microbiological reference standard (eMRS) and composite reference standard (CRS) for           |                                     |
| 18 | the detection of Mycobacterium tuberculosis complex DNA.....                                   | 8                                   |
| 19 | <b>Supplementary Table 3:</b> Study Ultra-positive patients who were culture- and cytology-    |                                     |
| 20 | negative, with information on their Ultra semi-quantitation category, previous TB status,      |                                     |
| 21 | TB treatment initiation status and patient’s status after at least 12-weeks of follow-up ..... | 9                                   |
| 22 | <b>Supplementary Table 4:</b> Diagnostic accuracy of Ultra on urine measured using the         |                                     |
| 23 | microbiological reference standard (MRS) in a head-to-head analysis stratified by HIV          |                                     |
| 24 | status.....                                                                                    | 11                                  |
| 25 | <b>Supplementary Table 5:</b> Diagnostic accuracy analyses (non-head-to-head top, head-to-     |                                     |
| 26 | head bottom) of routine Xpert and study Ultra (excluding traces) on FNABs using a MRS          |                                     |
| 27 | stratified by HIV status .....                                                                 | <b>Error! Bookmark not defined.</b> |
| 28 | <b>Supplementary Table 6:</b> Non-head-to-head and head-to-head diagnostic accuracy            |                                     |
| 29 | analyses of Xpert and Ultra using a microbiological reference standard (MRS), extended         |                                     |
| 30 | microbiological reference standard (eMRS) and composite reference standard (CRS) for           |                                     |
| 31 | the detection of Mycobacterium tuberculosis complex DNA, excluding trace positive Ultra        |                                     |
| 32 | results .....                                                                                  | 12                                  |
| 33 | <b>Supplementary Table 7:</b> Diagnostic accuracy analyses (non-head-to-head top, head-to-     |                                     |
| 34 | head bottom) of routine Xpert and study Ultra (reclassifying traces as negative) on FNABs      |                                     |
| 35 | using a MRS stratified by HIV status .....                                                     | <b>Error! Bookmark not defined.</b> |
| 36 | <b>Supplementary Table 8:</b> Non-head-to-head and head-to-head diagnostic accuracy            |                                     |
| 37 | analyses of Xpert and Ultra using a microbiological reference standard (MRS), extended         |                                     |
| 38 | microbiological reference standard (eMRS) and composite reference standard (CRS) for           |                                     |

39 the detection of Mycobacterium tuberculosis complex DNA, reclassifying trace positive  
40 Ultra results as negative ..... 14  
41

42 **Supplementary Table 1:** Reference standard definitions

|                                                        | MRS*                                                                            | eMRS†                                                                            | CRS‡                                                                                                         |
|--------------------------------------------------------|---------------------------------------------------------------------------------|----------------------------------------------------------------------------------|--------------------------------------------------------------------------------------------------------------|
| <b>Site of disease fluid</b>                           |                                                                                 |                                                                                  |                                                                                                              |
| Xpert                                                  | ✘                                                                               | ✔                                                                                | ✔                                                                                                            |
| MGIT960 Culture                                        | ✔                                                                               | ✔                                                                                | ✔                                                                                                            |
| Cytology                                               | ✔                                                                               | ✔                                                                                | ✔                                                                                                            |
| <b>Non-site-of disease fluid</b>                       |                                                                                 |                                                                                  |                                                                                                              |
| Smear                                                  | ✘                                                                               | ✔                                                                                | ✔                                                                                                            |
| Xpert                                                  | ✘                                                                               | ✔                                                                                |                                                                                                              |
| Ultra                                                  | ✘                                                                               | ✔                                                                                | ✔                                                                                                            |
| MGIT960 Culture                                        | ✘                                                                               | ✔                                                                                | ✔                                                                                                            |
| <b>Treatment information</b>                           |                                                                                 |                                                                                  |                                                                                                              |
| TB treatment initiated                                 | ✘                                                                               | ✘                                                                                | ✔                                                                                                            |
| Response to treatment self-reported by patient         | ✘                                                                               | ✘                                                                                | ✔                                                                                                            |
| <b>Case definitions</b>                                |                                                                                 |                                                                                  |                                                                                                              |
| <b>Reference standard positive (Definite TB cases)</b> | Any MRS test positive                                                           | Any eMRS test positive                                                           | Any eMRS test positive/or TB treatment was initiated and response to treatment documented                    |
| <b>Reference standard negative (Non-TB patients)</b>   | No MRS test positive                                                            | No eMRS test positive                                                            | No eMRS test positive and patient not initiated on treatment                                                 |
| <b>Probable TB patients</b>                            | N/A                                                                             | N/A                                                                              | No eMRS test positive, but treatment initiated                                                               |
| <b>Unclassifiable</b>                                  | No positive MRS test and site-of-disease fluid culture contaminated or not done | No positive eMRS test and site-of-disease fluid culture contaminated or not done | No positive eMRS test and site-of-disease fluid culture contaminated or not done, or treatment not initiated |

43 Abbreviations: Composite reference standard, CRS; Extended reference standard, eMRS; MGIT960 culture,  
 44 Mycobacteria Growth Indicator Tube 960; Microbiological reference standard, MRS; Smear, smear microscopy;  
 45 Ultra, Xpert MTB/RIF Ultra; Xpert, Xpert MTB/RIF.

46

47

48

49

50 **Definitions**

51 Microbiological reference standard

52 For the microbiological reference standard (MRS), a definite TB case was defined as a fine  
53 needle aspirate (FNAB) being culture-positive or cytology-positive and a non-TB patient was  
54 defined as being FNAB culture and cytology negative. Patients were unclassifiable if they had  
55 no positive MRS test and the site-of-disease culture was either contaminated or not done or  
56 cytology was not done.

57 Extended microbiological reference standard

58 For the extended microbiological reference standard (eMRS), a definite TB case was defined  
59 as a FNAB or any other body fluid being culture-, smear-, routine Xpert- or Ultra- positive and  
60 a non-TB case was defined as FNAB and other body fluids being culture-, smear-, Xpert-and  
61 Ultra- negative. Patients were considered unclassifiable if they had no positive eMRS test and  
62 the site-of-disease culture was either contaminated or not done.

63 Composite reference standard

64 For the composite reference standard (CRS), a definite TB case was defined as a FNAB or any  
65 other body fluid being culture-, smear-, Xpert- or Ultra- positive or TB treatment was initiated  
66 and response to treatment is documented; a probable-TB case was defined as a FNAB or any  
67 other body fluid being culture-, smear-, Xpert- or Ultra- positive or the patient being initiated  
68 on TB treatment after the 12-week follow up; and a non-TB case was defined as FNAB and  
69 other body fluids being culture-, smear-, Xpert-and Ultra- negative, and the patient was not  
70 initiated on TB treatment, and the patient was diagnosed with an alternative disease. Patients  
71 were unclassifiable if they had no positive eMRS test and the site-of-disease culture was either  
72 contaminated or not done, and treatment was not initiated.

73 **Supplementary Results**

74 Bacterial load in study Ultra and routine Xpert

75 No correlations were observed between study Ultra quantitation (IS6110/IS1081 C<sub>T</sub> and *rpoB*  
76 C<sub>Tmin</sub>) and culture time-to-positivity (TTP) and routine Xpert quantitation (*rpoB* C<sub>Tmin</sub>) and  
77 culture TTP (**Supplementary Figure 2**).

78 Drug susceptibility results of study Ultras on FNABs

79 Of 74 study Ultra-positive patients, 70% (52/74) were rifampicin-susceptible, 4% (3/74)  
80 resistant, and 26% (19/74) indeterminate (all trace). In patients who had actionable study Ultra  
81 and culture results (n=84), 20% (17/84) had MTBDR*plus* done. Of these, 18% (3/17) were  
82 MTBDR*plus* rifampicin-resistant and 82% (14/17) susceptible. 33% (1/3) of these  
83 MTBDR*plus* rifampicin-resistant patients were study Ultra rifampicin-resistant (one study  
84 Ultra trace-positive, rifampicin indeterminate and the other study Ultra negative), and 57%  
85 (8/14) of MTBDR*plus* rifampicin-susceptible patients were study Ultra rifampicin-susceptible  
86 (the remaining four were study Ultra trace-positive, rifampicin indeterminate and other  
87 remaining two were study Ultra-negative).

88 **Supplementary Figure 1:** Spaghetti and box and whiskers plots showing FNAB Ultra SPC  
 89  $C_T$ . (A) Study SPC  $C_T$  vs. routine SPC  $C_T$ . (B) SPC  $C_T$  from positive and negative study  
 90 Ultras. More inhibition was observed in positives. (C) SPC  $C_T$  in true-positive vs. false-  
 91 negative study Ultras, showing that greater inhibition is associated with Ultra missing TBL  
 92 cases. Abbreviations: FNAB, fine needle aspirate biopsy; SPC  $C_T$ ; sample processing control  
 93 cycle threshold value for the Xpert MTB/RIF Ultra (Ultra) internal positive control which  
 94 measures PCR inhibition; Ultra, Xpert MTB/RIF Ultra.

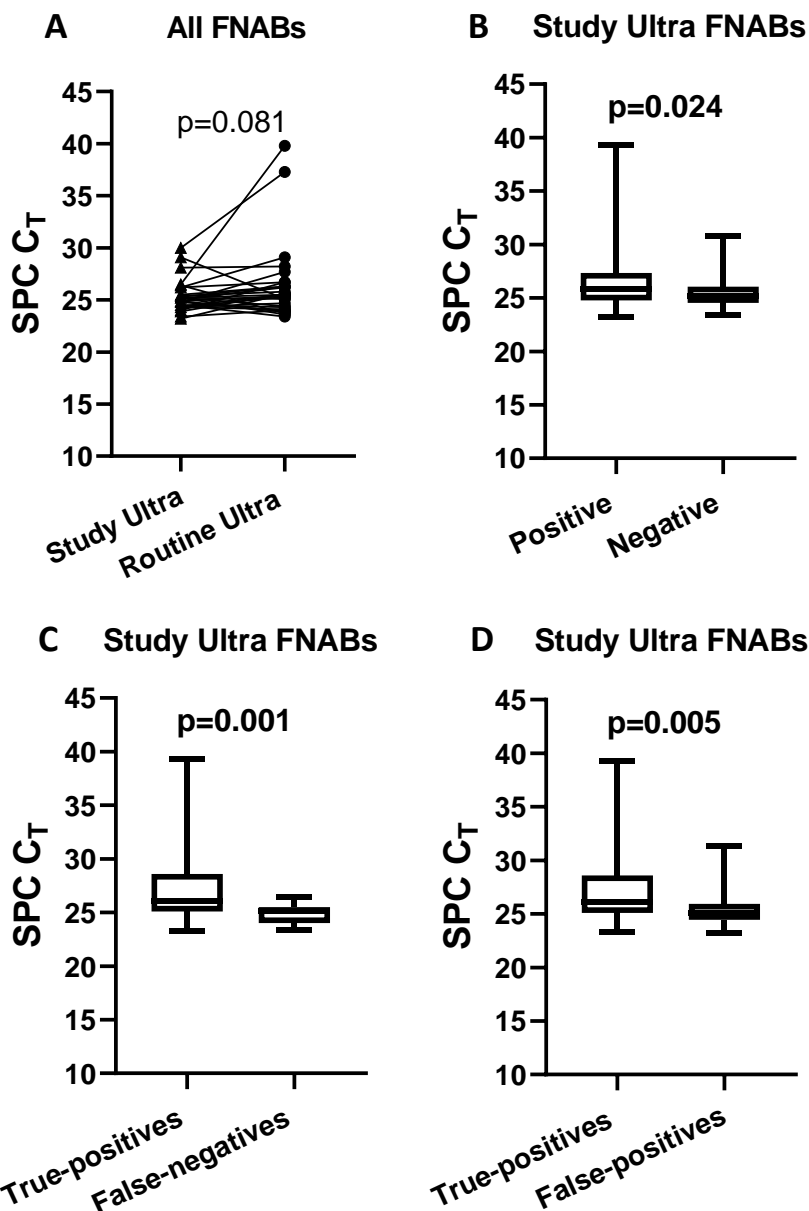

95

96 **Supplementary Figure 2:** FNAB Quantitative information of Ultra (IS6110/IS1081, *rpoB*) and Xpert (*rpoB*) compared with bacillary load  
97 (MGIT960 liquid culture TTP). (A) Study Ultra IS6110/IS1081  $C_T$  vs. MGIT960 liquid culture TTP. (B) Study Ultra *rpoB*  $C_{Tmin}$  vs. MGIT960  
98 liquid culture TTP. (C) Routine Xpert *rpoB*  $C_{Tmin}$  vs. MGIT960 liquid culture TTP. No correlations were observed. Only two culture-positive,  
99 routine Ultra-positive FNABs were present and routine Ultra results are hence not graphed. Abbreviations: FNAB, fine needle aspirate biopsy;  
100 TTP, culture time-to-positivity; Ultra, Xpert MTB/RIF Ultra; Xpert, Xpert MTB/RIF.

101

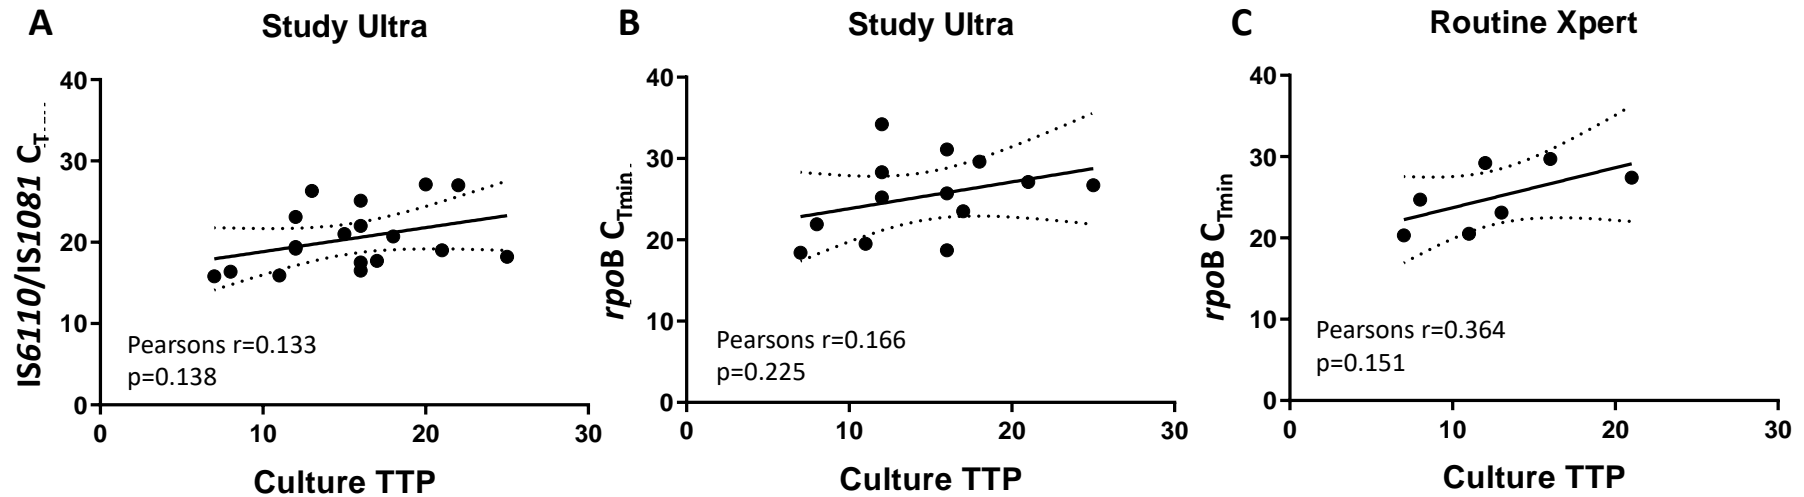

102

103 **Supplementary Table 2:** Non-head-to-head and head-to-head diagnostic accuracy analyses of Xpert and Ultra using a MRS, eMRS and CRS for  
 104 the detection of Mycobacterium tuberculosis complex DNA. Conclusions were like those for the MRS (**Table 2**). Data are %, 95% CI, and n/N

|       |       | Non-head-to-head                             |                                                    |                                                    |                                              |                                                          |                                                                |                                                                |                                                          |                                                                                              |                                                                                                    |                                                                                                    |                                                                                                    |
|-------|-------|----------------------------------------------|----------------------------------------------------|----------------------------------------------------|----------------------------------------------|----------------------------------------------------------|----------------------------------------------------------------|----------------------------------------------------------------|----------------------------------------------------------|----------------------------------------------------------------------------------------------|----------------------------------------------------------------------------------------------------|----------------------------------------------------------------------------------------------------|----------------------------------------------------------------------------------------------------|
|       |       | MRS                                          |                                                    |                                                    |                                              | eMRS                                                     |                                                                |                                                                |                                                          | CRS                                                                                          |                                                                                                    |                                                                                                    |                                                                                                    |
|       |       | n=96                                         |                                                    |                                                    |                                              | n=97                                                     |                                                                |                                                                |                                                          | n=97                                                                                         |                                                                                                    |                                                                                                    |                                                                                                    |
|       |       | Sensitivity                                  | Specificity                                        | PPV                                                | NPV                                          | Sensitivity                                              | Specificity                                                    | PPV                                                            | NPV                                                      | Sensitivity                                                                                  | Specificity                                                                                        | PPV                                                                                                | NPV                                                                                                |
| Xpert |       | 73 (58, 85)<br>35/48                         | 92 (80, 98)<br>44/48                               | 90 (76, 97)<br>35/39                               | 77 (64, 87)<br>44/57                         | 69 (55, 81)<br>36/52<br>p=0.685*                         | 91 (79, 98)<br>41/45<br>p=0.924*                               | 90 (76, 97)<br>36/40<br>p=0.970*                               | 72 (58, 83)<br>41/57<br>p=0.519*                         | 65 (52, 77)<br>39/60<br>p=0.635 <sup>±</sup><br>p=0.379 <sup>¥</sup>                         | 97 (86, 100)<br>36/37<br>p=0.244 <sup>±</sup><br>p=0.274 <sup>¥</sup>                              | 98 (87, 100)<br>39/40<br>p=0.166 <sup>±</sup><br>p=0.157 <sup>¥</sup>                              | 63 (49, 76)<br>36/57<br>p=0.317 <sup>±</sup><br>p=0.102 <sup>¥</sup>                               |
|       |       | n=130                                        |                                                    |                                                    |                                              | n=131                                                    |                                                                |                                                                |                                                          | n=131                                                                                        |                                                                                                    |                                                                                                    |                                                                                                    |
| Ultra |       | 85 (73, 93)<br>51/60<br>p=0.121 <sup>‡</sup> | 69 (56, 79)<br>48/70<br><b>p=0.003<sup>‡</sup></b> | 70 (58, 80)<br>51/73<br><b>p=0.018<sup>‡</sup></b> | 84 (76, 97)<br>48/57<br>p=0.343 <sup>‡</sup> | 83 (71, 91)<br>53/64<br>p=0.085 <sup>‡</sup><br>p=0.741* | 69 (56, 79)<br>46/67<br><b>p=0.005<sup>‡</sup></b><br>p=0.991* | 72 (60, 81)<br>53/74<br><b>p=0.024<sup>‡</sup></b><br>p=0.815* | 81 (68, 90)<br>46/57<br>p=0.271 <sup>‡</sup><br>p=0.622* | 76 (65, 85)<br>58/76<br>p=0.147 <sup>‡</sup><br>p=0.345 <sup>±</sup><br>p=0.207 <sup>¥</sup> | 71 (57, 82)<br>39/55<br><b>p=0.001<sup>‡</sup></b><br>p=0.788 <sup>±</sup><br>p=0.778 <sup>¥</sup> | 78 (67, 87)<br>58/74<br><b>p=0.006<sup>‡</sup></b><br>p=0.343 <sup>±</sup><br>p=0.238 <sup>¥</sup> | 68 (55, 80)<br>39/57<br>p=0.554 <sup>‡</sup><br>p=0.132 <sup>±</sup><br><b>p=0.047<sup>¥</sup></b> |
|       |       | Head-to-head                                 |                                                    |                                                    |                                              |                                                          |                                                                |                                                                |                                                          |                                                                                              |                                                                                                    |                                                                                                    |                                                                                                    |
|       |       | n=92                                         |                                                    |                                                    |                                              | n=92                                                     |                                                                |                                                                |                                                          | n=92                                                                                         |                                                                                                    |                                                                                                    |                                                                                                    |
| Xpert |       | 72 (57, 84)<br>33/46                         | 93 (82, 99)<br>43/46                               | 92 (78, 98)<br>33/36                               | 77 (64, 87)<br>43/56                         | 67 (52, 80)<br>33/49<br>p=0.642*                         | 93 (81, 99)<br>40/43<br>p=0.068*                               | 92 (78, 98)<br>33/36<br>p>0.999*                               | 71 (58, 83)<br>40/56<br>p=0.518*                         | 64 (50, 76)<br>35/55<br>p=0.691 <sup>±</sup><br>p=0.387 <sup>¥</sup>                         | 97 (86, 100)<br>36/37<br>p=0.382 <sup>±</sup><br>p=0.419 <sup>¥</sup>                              | 97 (85, 100)<br>35/36<br>p=0.304 <sup>±</sup><br>p=0.304 <sup>¥</sup>                              | 64 (50, 77)<br>36/56<br>p=0.418 <sup>±</sup><br>p=0.147 <sup>¥</sup>                               |
|       | Ultra |                                              | 91 (79, 98)<br>42/46<br><b>p=0.016<sup>‡</sup></b> | 76 (61, 87)<br>35/46<br><b>p=0.020<sup>‡</sup></b> | 79 (66, 89)<br>42/53<br>p=0.114 <sup>‡</sup> | 90 (76, 97)<br>35/39<br>p=0.105 <sup>‡</sup>             | 88 (75, 95)<br>43/49<br><b>p=0.016<sup>‡</sup></b><br>p=0.573* | 77 (61, 88)<br>33/43<br><b>p=0.035<sup>‡</sup></b><br>p=0.942* | 81 (68, 91)<br>43/53<br>p=0.167 <sup>‡</sup><br>p=0.808* | 85 (69, 94)<br>33/39<br>p=0.134 <sup>‡</sup><br>p=0.498*                                     | 84 (71, 92)<br>46/55<br><b>p=0.017<sup>‡</sup></b><br>p=0.551 <sup>±</sup><br>p=0.252 <sup>¥</sup> | 81 (65, 92)<br>30/37<br><b>p=0.025<sup>‡</sup></b><br>p=0.636 <sup>±</sup><br>p=0.583 <sup>¥</sup> | 87 (75, 95)<br>46/53<br>p=0.091 <sup>‡</sup><br>p=0.427 <sup>±</sup><br>p=0.301 <sup>¥</sup>       |

105 Within rows: \*MRS vs. eMRS, eMRS vs. CRS<sup>±</sup>, MRS vs. CRS<sup>¥</sup>; Within columns: Xpert vs. Ultra<sup>‡</sup>

106 Abbreviations: CI, confidence interval; CRS, composite reference standard; eMRS, extended microbiological reference standard; MRS, microbiological reference standard;

107 NPV, Negative predictive value; PPV, Positive predictable value; Ultra, Xpert MTB/RIF Ultra; Xpert, Xpert MTB/RIF.



108 **Supplementary Table 3:** Per patient information for study Ultra-positive patients that were  
 109 MRS -negative (culture- and cytology-negative) with information on their Ultra semi-  
 110 quantitation category, previous TB status, TB treatment initiation status and patient's status  
 111 after at least 12-weeks of follow-up. Data are n/N (%).

| Patient ID     | Previous TB | Study Ultra semi-quantitation category                                         | Routine PCR result                                                                                                     | Treatment initiated after 12-week follow up | Did the patient get better? (asked telephonically if patient started treatment) |
|----------------|-------------|--------------------------------------------------------------------------------|------------------------------------------------------------------------------------------------------------------------|---------------------------------------------|---------------------------------------------------------------------------------|
| FNAB038        | No          | Trace                                                                          | Xpert-negative                                                                                                         | No                                          | N/A                                                                             |
| FNAB060        | No          | Very Low                                                                       | Xpert-negative                                                                                                         | Yes                                         | Yes                                                                             |
| FNAB072        | No          | Very Low                                                                       | Xpert-negative                                                                                                         | No                                          | N/A                                                                             |
| FNAB076        | No          | Medium                                                                         | Xpert-positive (Low)                                                                                                   | Yes                                         | Yes                                                                             |
| FNAB110        | No          | Trace                                                                          | Xpert-negative                                                                                                         | No                                          | N/A                                                                             |
| FNAB114        | No          | Medium                                                                         | Xpert-positive (Medium)                                                                                                | No                                          | N/A                                                                             |
| FNAB128        | No          | Trace                                                                          | Xpert-negative                                                                                                         | No                                          | N/A                                                                             |
| FNAB132        | No          | Trace                                                                          | Xpert-negative                                                                                                         | No                                          | N/A                                                                             |
| FNAB172        | No          | Low                                                                            | Xpert-negative                                                                                                         | Yes                                         | Yes                                                                             |
| FNAB180        | Yes         | Low                                                                            | Xpert-negative                                                                                                         | No                                          | N/A                                                                             |
| FNAB200        | No          | Low                                                                            | Xpert-positive (Low)                                                                                                   | Yes                                         | Yes                                                                             |
| FNAB206        | Yes         | Trace                                                                          | Not done                                                                                                               | No                                          | N/A                                                                             |
| FNAB210        | Yes         | Trace                                                                          | Ultra-negative                                                                                                         | No                                          | N/A                                                                             |
| FNAB214        | No          | Trace                                                                          | Ultra-negative                                                                                                         | No                                          | N/A                                                                             |
| FNAB218        | Yes         | Trace                                                                          | Ultra-negative                                                                                                         | No                                          | N/A                                                                             |
| FNAB220        | No          | Trace                                                                          | Ultra-positive (Very low)                                                                                              | Yes                                         | Yes                                                                             |
| FNAB230        | No          | Trace                                                                          | Ultra-negative                                                                                                         | No                                          | N/A                                                                             |
| FNAB232        | Yes         | Medium                                                                         | Ultra-positive (Medium)                                                                                                | Yes                                         | Yes                                                                             |
| FNAB245        | No          | Trace                                                                          | Ultra-negative                                                                                                         | No                                          | N/A                                                                             |
| FNAB251        | Yes         | Trace                                                                          | Ultra-negative                                                                                                         | No                                          | N/A                                                                             |
| FNAB273        | No          | Trace                                                                          | Ultra-negative                                                                                                         | No                                          | N/A                                                                             |
| FNAB403        | No          | Medium                                                                         | Ultra-positive (Medium)                                                                                                | No                                          | N/A                                                                             |
| <b>Overall</b> | 6/22 (27)   | Trace: 13/22 (59)<br>Very low: 2/22 (9)<br>Low: 3/22 (14)<br>Medium: 4/22 (18) | Xpert: 11/21 (52) positive, 3/11 (27) negative, 8/11 (73)<br>Ultra: 10/21 (48) positive, 3/10 (30) negative, 7/10 (70) | 6/22 (27)                                   | 6/6 (100)                                                                       |

112 Missing data: Routine PCR not done, n=1.

- 113 Abbreviations: FNAB, fine needle aspirate biopsy; PCR, polymerase chain reaction; Ultra, Xpert MTB/RIF  
114 Ultra.  
115 If the patient was not initiated on TB treatment, N/A was recorded in the last column.

116 **Supplementary Table 4:** Diagnostic accuracy of Ultra on urine or FNABs measured using the MRS in a head-to-head analysis stratified by HIV  
 117 status. Urine Ultra had lower sensitivity than FNAB Ultra but increased specificity (**Table 2**). Data are %, 95% CI, and n/N

|                         | All patients                     |                                  |                                  |                                  | HIV-negative                   |                                 |                     |                                 | HIV-positive                                 |                                              |                                              |                                              |
|-------------------------|----------------------------------|----------------------------------|----------------------------------|----------------------------------|--------------------------------|---------------------------------|---------------------|---------------------------------|----------------------------------------------|----------------------------------------------|----------------------------------------------|----------------------------------------------|
|                         | n=76                             |                                  |                                  |                                  | n=18/75 (24)                   |                                 |                     |                                 | n=57/75 (76)                                 |                                              |                                              |                                              |
|                         | Sensitivity                      | Specificity                      | PPV                              | NPV                              | Sensitivity                    | Specificity                     | PPV                 | NPV                             | Sensitivity                                  | Specificity                                  | PPV                                          | NPV                                          |
| <b>Urine-Ultra</b>      | 18 (7, 35)<br>6/33               | 98 (88, 100)<br>42/43            | 86 (42, 100)<br>6/7              | 61 (48, 72)<br>42/69             | 0 (0, 52)<br>0/5               | 100 (75, 100)<br>13/13          | 0/0                 | 72 (47, 90)<br>13/18            | 21 (8, 41)<br>6/28<br>p=0.252*               | 97 (82, 100)<br>28/29<br>p=498*              | 86 (42, 100)<br>6/7                          | 56 (41, 70)<br>28/50<br>p=0.228*             |
| <b>Study FNAB-Ultra</b> | 91 (76, 98)<br>30/33<br>p<0.001‡ | 60 (44, 75)<br>26/43<br>p<0.001‡ | 64 (49, 77)<br>30/47<br>p=0.252‡ | 90 (73, 98)<br>26/29<br>p=0.005‡ | 80 (28, 99)<br>4/5<br>p=0.010‡ | 38 (14, 68)<br>5/13<br>p=0.001‡ | 33 (10, 65)<br>4/12 | 83 (36, 100)<br>5/6<br>p=0.586‡ | 93 (76, 99)<br>26/28<br>p<0.001‡<br>p=0.357* | 69 (49, 85)<br>20/29<br>p=0.005‡<br>p=0.063* | 74 (57, 88)<br>26/35<br>p=0.517‡<br>p=0.011* | 91 (71, 99)<br>20/22<br>p=0.004‡<br>p=0.595* |

118 Missing data: Non-actionable Ultras (n=1), no HIV (n=1) in the head-to-head table.

119 Within column p-values: ‡ Urine-Ultra vs. FNAB-Ultra

120 Within row p-values: \*HIV-negative vs. HIV-positive

121 Abbreviations: CI, confidence interval; CRS, composite reference standard; eMRS, extended microbiological reference standard; MRS, microbiological reference standard;

122 NPV, negative predictive value; PPV, positive predictive value; Xpert, Xpert MTB/RIF; Ultra, Xpert MTB/RIF Ultra

123 **Supplementary Table 5:** Non-head-to-head and head-to-head diagnostic accuracy analyses of Xpert and Ultra using a MRS, eMRS and CRS for  
 124 the detection of *Mycobacterium tuberculosis complex* DNA with and without exclusion of Ultra trace results. Routine Xpert results were compared  
 125 to study Ultra results. Ultra has similar diagnostic accuracy compared to Xpert after trace positive exclusion. Study Ultra results with trace excluded  
 126 were like study Ultra results. Similar trends are seen across reference standards. Data are %, 95% CI, and n/N.

| Non-head-to-head              |                                              |                                              |                                              |                                              |                                                          |                                                          |                                                          |                                                          |                                                                                  |                                                                                  |                                                                                  |                                                                                  |
|-------------------------------|----------------------------------------------|----------------------------------------------|----------------------------------------------|----------------------------------------------|----------------------------------------------------------|----------------------------------------------------------|----------------------------------------------------------|----------------------------------------------------------|----------------------------------------------------------------------------------|----------------------------------------------------------------------------------|----------------------------------------------------------------------------------|----------------------------------------------------------------------------------|
| MRS                           |                                              |                                              |                                              | eMRS                                         |                                                          |                                                          |                                                          | CRS                                                      |                                                                                  |                                                                                  |                                                                                  |                                                                                  |
| n=96                          |                                              |                                              |                                              | n=97                                         |                                                          |                                                          |                                                          | n=97                                                     |                                                                                  |                                                                                  |                                                                                  |                                                                                  |
| Sensitivity                   | Specificity                                  | PPV                                          | NPV                                          | Sensitivity                                  | Specificity                                              | PPV                                                      | NPV                                                      | Sensitivity                                              | Specificity                                                                      | PPV                                                                              | NPV                                                                              |                                                                                  |
| Xpert <sup>o</sup>            | 73 (58, 85)<br>35/48                         | 92 (80, 98)<br>44/48                         | 90 (76, 97)<br>35/39                         | 77 (64, 87)<br>44/57                         | 69 (55, 81)<br>36/52<br>p=0.685*                         | 91 (79, 98)<br>41/45<br>p=0.924*                         | 90 (76, 97)<br>36/40<br>p=0.510*                         | 72 (58, 83)<br>41/57<br>p=0.519*                         | 65 (52, 77)<br>39/60<br>p=0.635±<br>p=0.379 <sup>¥</sup>                         | 97 (86, 100)<br>36/37<br>p=0.244±<br>p=0.274 <sup>¥</sup>                        | 98 (87, 100)<br>39/40<br>p=0.166±<br>p=0.157 <sup>¥</sup>                        | 63 (49, 76)<br>36/57<br>p=0.317±<br>p=0.102 <sup>¥</sup>                         |
|                               | n=111                                        |                                              |                                              | n=112                                        |                                                          |                                                          |                                                          | n=112                                                    |                                                                                  |                                                                                  |                                                                                  |                                                                                  |
| Ultra excluding trace         | 83 (71, 92)<br>45/54<br>p=0.201 <sup>‡</sup> | 84 (72, 93)<br>48/57<br>p=0.248 <sup>‡</sup> | 83 (71, 92)<br>45/54<br>p=0.379 <sup>‡</sup> | 84 (72, 93)<br>48/57<br>p=0.343 <sup>‡</sup> | 81 (69, 90)<br>47/58<br>p=0.151 <sup>‡</sup><br>p=0.751* | 85 (73, 93)<br>46/54<br>p=0.368 <sup>‡</sup><br>p=0.887* | 85 (73, 94)<br>47/55<br>p=0.510 <sup>‡</sup><br>p=0.760* | 81 (68, 90)<br>46/57<br>p=0.271 <sup>‡</sup><br>p=0.622* | 74 (62, 84)<br>51/69<br>p=0.272 <sup>‡</sup><br>p=0.341±<br>p=0.210 <sup>¥</sup> | 91 (78, 97)<br>39/43<br>p=0.224 <sup>‡</sup><br>p=0.413±<br>p=0.340 <sup>¥</sup> | 93 (82, 98)<br>51/55<br>p=0.304 <sup>‡</sup><br>p=0.221±<br>p=0.120 <sup>¥</sup> | 68 (55, 80)<br>39/57<br>p=0.554 <sup>‡</sup><br>p=0.132±<br>p=0.047 <sup>¥</sup> |
| Δ Trace excluded <sup>Φ</sup> | -2 (-15, 12)<br>p=0.808 <sup>§</sup>         | +15 (1, 30)<br>p=0.041 <sup>§</sup>          | +13 (-1, 28)<br>p=0.081 <sup>§</sup>         | 0 (-13, 13)<br>p>0.999 <sup>§</sup>          | -2 (-15, 12)<br>p=0.799 <sup>§</sup>                     | +16 (2, 31)<br>p=0.034 <sup>§</sup>                      | +13 (-0.03, 28)<br>p=0.063 <sup>§</sup>                  | 0 (-14, 14)<br>p>0.999 <sup>§</sup>                      | -2 (-16, 12)<br>p=0.738 <sup>§</sup>                                             | +20 (5, 35)<br>p=0.016 <sup>§</sup>                                              | +15 (3, 26)<br>p=0.026 <sup>§</sup>                                              | 0 (-17, 17)<br>p>0.999 <sup>§</sup>                                              |
| Head-to-head                  |                                              |                                              |                                              |                                              |                                                          |                                                          |                                                          |                                                          |                                                                                  |                                                                                  |                                                                                  |                                                                                  |
| n=82                          |                                              |                                              |                                              | n=82                                         |                                                          |                                                          |                                                          | n=82                                                     |                                                                                  |                                                                                  |                                                                                  |                                                                                  |
| Xpert <sup>o</sup>            | 80 (64, 91)<br>32/40                         | 93 (81, 99)<br>39/42                         | 91 (77, 98)<br>32/35                         | 83 (69, 92)<br>39/47                         | 74 (59, 86)<br>32/43<br>p=0.545*                         | 92 (79, 98)<br>36/39<br>p=0.925*                         | 91 (77, 98)<br>32/35<br>p>0.999*                         | 77 (62, 88)<br>36/47<br>p=0.441*                         | 69 (55, 82)<br>34/49<br>p=0.593±<br>p=0.255 <sup>¥</sup>                         | 97 (84, 100)<br>32/33<br>p=0.390±<br>p=0.431 <sup>¥</sup>                        | 97 (85, 100)<br>34/35<br>p=0.303±<br>p=0.303 <sup>¥</sup>                        | 68 (53, 81)<br>32/47<br>p=0.356±<br>p=0.093 <sup>¥</sup>                         |
| Ultra excluding trace         | 90 (76, 97)<br>36/40<br>p=0.210 <sup>‡</sup> | 83 (69, 93)<br>35/42<br>p=0.178 <sup>‡</sup> | 84 (69, 93)<br>36/43<br>p=0.311 <sup>‡</sup> | 90 (76, 97)<br>35/39<br>p=0.367 <sup>‡</sup> | 86 (72, 95)<br>37/43<br>p=0.176 <sup>‡</sup><br>p=0.580* | 85 (69, 94)<br>33/39<br>p=0.288 <sup>‡</sup><br>p=0.875* | 86 (72, 95)<br>37/43<br>p=0.459 <sup>‡</sup><br>p=0.763* | 85 (69, 94)<br>33/39<br>p=0.353 <sup>‡</sup><br>p=0.498* | 82 (68, 91)<br>40/49<br>p=0.159 <sup>‡</sup><br>p=0.567±<br>p=0.266 <sup>¥</sup> | 91 (76, 98)<br>30/33<br>p=0.302 <sup>‡</sup><br>p=0.421±<br>p=0.338 <sup>¥</sup> | 93 (81, 99)<br>40/43<br>p=0.412 <sup>‡</sup><br>p=0.291<br>p=0.178 <sup>¥</sup>  | 77 (61, 89)<br>30/39<br>p=0.363 <sup>‡</sup><br>p=0.389±<br>p=0.129 <sup>¥</sup> |
| Δ Trace excluded <sup>Φ</sup> | -1 (-14, 11)<br>p=0.836 <sup>§</sup>         | +7 (-9, 24)<br>p=0.400 <sup>§</sup>          | +5 (-11, 20)<br>p=0.576 <sup>§</sup>         | 0 (-13, 13)<br>p>0.999 <sup>§</sup>          | -2 (-16, 12)<br>p=0.808 <sup>§</sup>                     | +8 (-9, 25)<br>p=0.369 <sup>§</sup>                      | +5 (-10, 20)<br>p=0.521 <sup>§</sup>                     | 0 (-16, 16)<br>p=0.484 <sup>§</sup>                      | -2 (-17, 13)<br>p=0.788 <sup>§</sup>                                             | +10 (-6, 26)<br>p=0.241 <sup>§</sup>                                             | +6 (-6, 18)<br>p=0.320 <sup>§</sup>                                              | 0 (-18, 18)<br>p>0.999 <sup>§</sup>                                              |

127 Within column p-values: <sup>‡</sup>Xpert vs. Ultra within an analysis (non-head-to-head or head-to-head) in patients of the same HIV status (overall, negative, or positive), <sup>§</sup>Study  
128 Ultra results (Supplementary Table 2) vs. study Ultra results excluding trace results within an analysis (non-head-to-head or head-to-head) in patients using different  
129 reference standards (MRS, eMRS, or CRS).  
130 Within row p-values: <sup>\*</sup>MRS vs. eMRS, <sup>‡</sup>eMRS vs. CRS, <sup>¥</sup>MRS vs. CRS within an analysis (non-head-to-head or head-to-head).  
131 <sup>°</sup>Although Xpert data are already shown in Supplementary Table 2, small differences in the number of samples included occur in the head-to-head comparison. For the non-  
132 head-to-head comparison the Xpert data are identical to that in Supplementary Table 2 but are included here for readability.  
133 <sup>ϕ</sup>This comparison is Ultra with traces excluded vs. Ultra with traces included and considered positive.  
134 Abbreviations: CRS, composite reference standard; eMRS, extended microbiological reference standard; MRS, microbiological reference standard; Ultra, Xpert MTB/RIF  
135 Ultra; Xpert, Xpert MTB/RIF.

136

137 **Supplementary Table 6:** Non-head-to-head and head-to-head diagnostic accuracy analyses of Xpert and Ultra using a MRS, eMRS and CRS for  
 138 the detection of Mycobacterium tuberculosis complex DNA, reclassifying trace positive Ultra results as negative. Routine Xpert results were  
 139 compared to study Ultra results. Ultra has similar diagnostic accuracy compared to Xpert when trace positive results are reclassified as negative.  
 140 Study Ultra results with trace reclassified had increased sensitivity and decreased specificity compared to normal study Ultra results. Similar trends  
 141 are seen across reference standards. Data are %, 95% CI, and n/N.

|                                         | Non-head-to-head                             |                                              |                                              |                                              |                                                          |                                                          |                                                          |                                                          |                                                                                  |                                                                                  |                                                                                  |                                                                                  |
|-----------------------------------------|----------------------------------------------|----------------------------------------------|----------------------------------------------|----------------------------------------------|----------------------------------------------------------|----------------------------------------------------------|----------------------------------------------------------|----------------------------------------------------------|----------------------------------------------------------------------------------|----------------------------------------------------------------------------------|----------------------------------------------------------------------------------|----------------------------------------------------------------------------------|
|                                         | MRS                                          |                                              |                                              |                                              | eMRS                                                     |                                                          |                                                          |                                                          | CRS                                                                              |                                                                                  |                                                                                  |                                                                                  |
|                                         | n=96                                         |                                              |                                              |                                              | n=97                                                     |                                                          |                                                          |                                                          | n=97                                                                             |                                                                                  |                                                                                  |                                                                                  |
|                                         | Sensitivity                                  | Specificity                                  | PPV                                          | NPV                                          | Sensitivity                                              | Specificity                                              | PPV                                                      | NPV                                                      | Sensitivity                                                                      | Specificity                                                                      | PPV                                                                              | NPV                                                                              |
| <b>Xpert<sup>o</sup></b>                | 73 (58, 85)<br>35/48                         | 92 (80, 98)<br>44/48                         | 90 (76, 97)<br>35/39                         | 77 (64, 87)<br>44/57                         | 69 (55, 81)<br>36/52<br>p=0.685*                         | 91 (79, 98)<br>41/45<br>p=0.924*                         | 90 (76, 97)<br>36/40<br>p=0.510*                         | 72 (58, 83)<br>41/57<br>p=0.519*                         | 65 (52, 77)<br>39/60<br>p=0.635±<br>p=0.379 <sup>‡</sup>                         | 97 (86, 100)<br>36/37<br>p=0.244±<br>p=0.274 <sup>‡</sup>                        | 98 (87, 100)<br>39/40<br>p=0.166±<br>p=0.157 <sup>‡</sup>                        | 63 (49, 76)<br>36/57<br>p=0.317±<br>p=0.102 <sup>‡</sup>                         |
|                                         | <b>n=130</b>                                 |                                              |                                              |                                              | <b>n=131</b>                                             |                                                          |                                                          |                                                          | <b>n=131</b>                                                                     |                                                                                  |                                                                                  |                                                                                  |
| <b>Ultra with trace reclassified</b>    | 75 (62, 85)<br>45/60<br>p=0.806 <sup>‡</sup> | 87 (77, 94)<br>61/70<br>p=0.441 <sup>‡</sup> | 83 (71, 92)<br>45/54<br>p=0.379 <sup>‡</sup> | 80 (70, 89)<br>61/76<br>p=0.667 <sup>‡</sup> | 73 (61, 84)<br>47/64<br>p=0.618 <sup>‡</sup><br>p=0.843* | 88 (78, 95)<br>59/67<br>p=0.609 <sup>‡</sup><br>p=0.871* | 85 (73, 94)<br>47/55<br>p=0.510 <sup>‡</sup><br>p=0.760* | 78 (67, 86)<br>59/76<br>p=0.451 <sup>‡</sup><br>p=0.691* | 67 (55, 77)<br>51/76<br>p=0.797 <sup>‡</sup><br>p=0.415±<br>p=0.316 <sup>‡</sup> | 93 (82, 98)<br>51/55<br>p=0.343 <sup>‡</sup><br>p=0.389±<br>p=0.310 <sup>‡</sup> | 93 (82, 98)<br>51/55<br>p=0.304 <sup>‡</sup><br>p=0.221±<br>p=0.130 <sup>‡</sup> | 67 (55, 77)<br>51/76<br>p=0.636 <sup>‡</sup><br>p=0.147±<br>p=0.066 <sup>‡</sup> |
| <b>Δ Trace reclassified<sup>φ</sup></b> | -10 (-19, -1)<br><b>p=0.014<sup>§</sup></b>  | +18 (8, 29)<br><b>p&lt;0.001<sup>§</sup></b> | +13 (-1, 28)<br>p=0.081 <sup>§</sup>         | -4 (-17, 9)<br>p=0.558 <sup>§</sup>          | +10 (-18, 1)<br><b>p=0.014<sup>§</sup></b>               | +19 (8, 30)<br><b>p&lt;0.001<sup>§</sup></b>             | +13 (-0.03, 28)<br>p=0.063 <sup>§</sup>                  | -3 (-17, 11)<br>p=0.667 <sup>§</sup>                     | -9 (-17, 1)<br><b>p=0.008<sup>§</sup></b>                                        | +22 (9, 35)<br><b>p=0.001<sup>§</sup></b>                                        | +15 (3, 26)<br><b>p=0.026<sup>§</sup></b>                                        | +1 (-17, 14)<br>p=0.873 <sup>§</sup>                                             |
|                                         | Head-to-head                                 |                                              |                                              |                                              |                                                          |                                                          |                                                          |                                                          |                                                                                  |                                                                                  |                                                                                  |                                                                                  |
|                                         | n=92                                         |                                              |                                              |                                              | n=92                                                     |                                                          |                                                          |                                                          | n=92                                                                             |                                                                                  |                                                                                  |                                                                                  |
| <b>Xpert<sup>o</sup></b>                | 72 (57, 84)<br>33/46                         | 93 (82, 99)<br>43/46                         | 92 (78, 98)<br>33/36                         | 77 (64, 87)<br>43/56                         | 67 (52, 80)<br>33/49<br>p=0.642*                         | 93 (81, 99)<br>40/43<br>p=0.932*                         | 92 (78, 98)<br>33/36<br>p>0.999*                         | 71 (58, 83)<br>40/56<br>p=0.518*                         | 64 (50, 76)<br>35/55<br>p=0.691±<br>p=0.387 <sup>‡</sup>                         | 97 (86, 100)<br>36/37<br>p=0.382±<br>p=0.419 <sup>‡</sup>                        | 97 (85, 100)<br>35/36<br>p=0.304±<br>p=0.303 <sup>‡</sup>                        | 64 (50, 77)<br>36/56<br>p=0.418±<br>p=0.147 <sup>‡</sup>                         |
| <b>Ultra with trace reclassified</b>    | 78 (64, 89)<br>36/46<br>p=0.470 <sup>‡</sup> | 85 (71, 94)<br>39/46<br>p=0.180 <sup>‡</sup> | 84 (69, 93)<br>36/43<br>p=0.290 <sup>‡</sup> | 80 (66, 90)<br>39/49<br>p=0.729 <sup>‡</sup> | 76 (61, 87)<br>37/49<br>p=0.371 <sup>‡</sup><br>p=0.751* | 86 (72, 95)<br>37/43<br>p=0.291 <sup>‡</sup><br>p=0.763* | 86 (72, 95)<br>37/43<br>p=0.434 <sup>‡</sup><br>p=0.763* | 76 (61, 87)<br>37/49<br>p=0.637 <sup>‡</sup><br>p=0.498* | 73 (59, 84)<br>40/55<br>p=0.306 <sup>‡</sup><br>p=0.747±<br>p=0.521 <sup>‡</sup> | 92 (78, 98)<br>34/37<br>p=0.304 <sup>‡</sup><br>p=0.409±<br>p=0.323 <sup>‡</sup> | 93 (81, 99)<br>40/43<br>p=0.397 <sup>‡</sup><br>p=0.291±<br>p=0.178 <sup>‡</sup> | 69 (55, 82)<br>34/49<br>p=0.580 <sup>‡</sup><br>p=0.489±<br>p=0.247 <sup>‡</sup> |
| <b>Δ Trace reclassified<sup>φ</sup></b> | -13 (-25, 1)<br><b>p=0.014<sup>§</sup></b>   | +9 (-2, 19)<br><b>p=0.046<sup>§</sup></b>    | +5 (-11, 20)<br>p=0.576 <sup>§</sup>         | -10 (-25, 5)<br>p=0.196 <sup>§</sup>         | -12 (-23, -1)<br><b>p=0.014<sup>§</sup></b>              | +9 (-2, 20)<br><b>p=0.046<sup>§</sup></b>                | +5 (-10, 20)<br>p=0.521 <sup>§</sup>                     | -9 (-26, 7)<br>p=0.293 <sup>§</sup>                      | -11 (-21, -1)<br><b>p=0.014<sup>§</sup></b>                                      | +11 (-2, 24)<br><b>p=0.046<sup>§</sup></b>                                       | +6 (-6, 18)<br>p=0.320 <sup>§</sup>                                              | -8 (-26, 11)<br>p=0.430 <sup>§</sup>                                             |

142 Within column p-values: <sup>‡</sup>Xpert vs. Ultra within an analysis (non-head-to-head or head-to-head) in patients of the same HIV status (overall, negative, or positive), <sup>§</sup>Study  
143 Ultra results (Supplementary Table 2) vs. study Ultra results excluding trace results within an analysis (non-head-to-head or head-to-head) in patients using different  
144 reference standards (MRS, eMRS, or CRS).  
145 Within row p-values: <sup>\*</sup>MRS vs. eMRS, <sup>‡</sup>eMRS vs. CRS, <sup>¥</sup>MRS vs. CRS within an analysis (non-head-to-head or head-to-head).  
146 <sup>°</sup>Although Xpert data are already shown in Supplementary Table 2, small differences in the number of samples included occur in the head-to-head comparison. For the non-  
147 head-to-head comparison the Xpert data are identical to that in Supplementary Table 2 but are included here for readability.  
148 <sup>‡</sup>This comparison is Ultra with traces reclassified as negative vs. Ultra with traces considered positive.  
149 Abbreviations: CRS, composite reference standard; eMRS, extended microbiological reference standard; MRS, microbiological reference standard; Ultra, Xpert MTB/RIF  
150 Ultra; Xpert, Xpert MTB/RIF.
